# Supplementary material
Source: PubMed Central journal article supplement (PMC3890100)
Supplement: NIHMS544285-supplement-Supplemental_Data.pdf [file NIHMS544285-supplement-Supplemental_Data.pdf]

# Data Supplement

## **Detrimental role of the airway mucin Muc5ac during ventilator induced lung injury**

Michael Koeppen<sup>1,2</sup>, Eóin N. McNamee<sup>1</sup>, Kelley S. Brodsky<sup>1</sup>, Carol M. Aherne<sup>1</sup>,

Marion Faigle<sup>3</sup>, Gregory P. Downey<sup>4,5</sup>, Sean P. Colgan<sup>6</sup>, Christopher M. Evans<sup>5</sup>

David A. Schwartz<sup>5</sup> and Holger K. Eltzschig<sup>1,6</sup>

<sup>1</sup>Mucosal Inflammation Program, Department of Anesthesiology, University of Colorado Anschutz Medical Campus, Aurora, CO 80045, USA

<sup>2</sup>Department of Anaesthesiology, Ludwig-Maximilians-University, Munich, Germany

<sup>3</sup>Department of Anesthesiology, Tübingen University Hospital, D-72072 Tübingen, Germany

<sup>4</sup>Division of Pulmonary and Critical Care Medicine, Department of Medicine, National Jewish Health, Denver, Colorado

<sup>5</sup>Department of Medicine, University of Colorado Anschutz Medical Campus, Aurora, CO 80045, USA

<sup>6</sup>Mucosal Inflammation Program, Department of Medicine, University of Colorado Anschutz Medical Campus, Aurora, CO 80045, USA

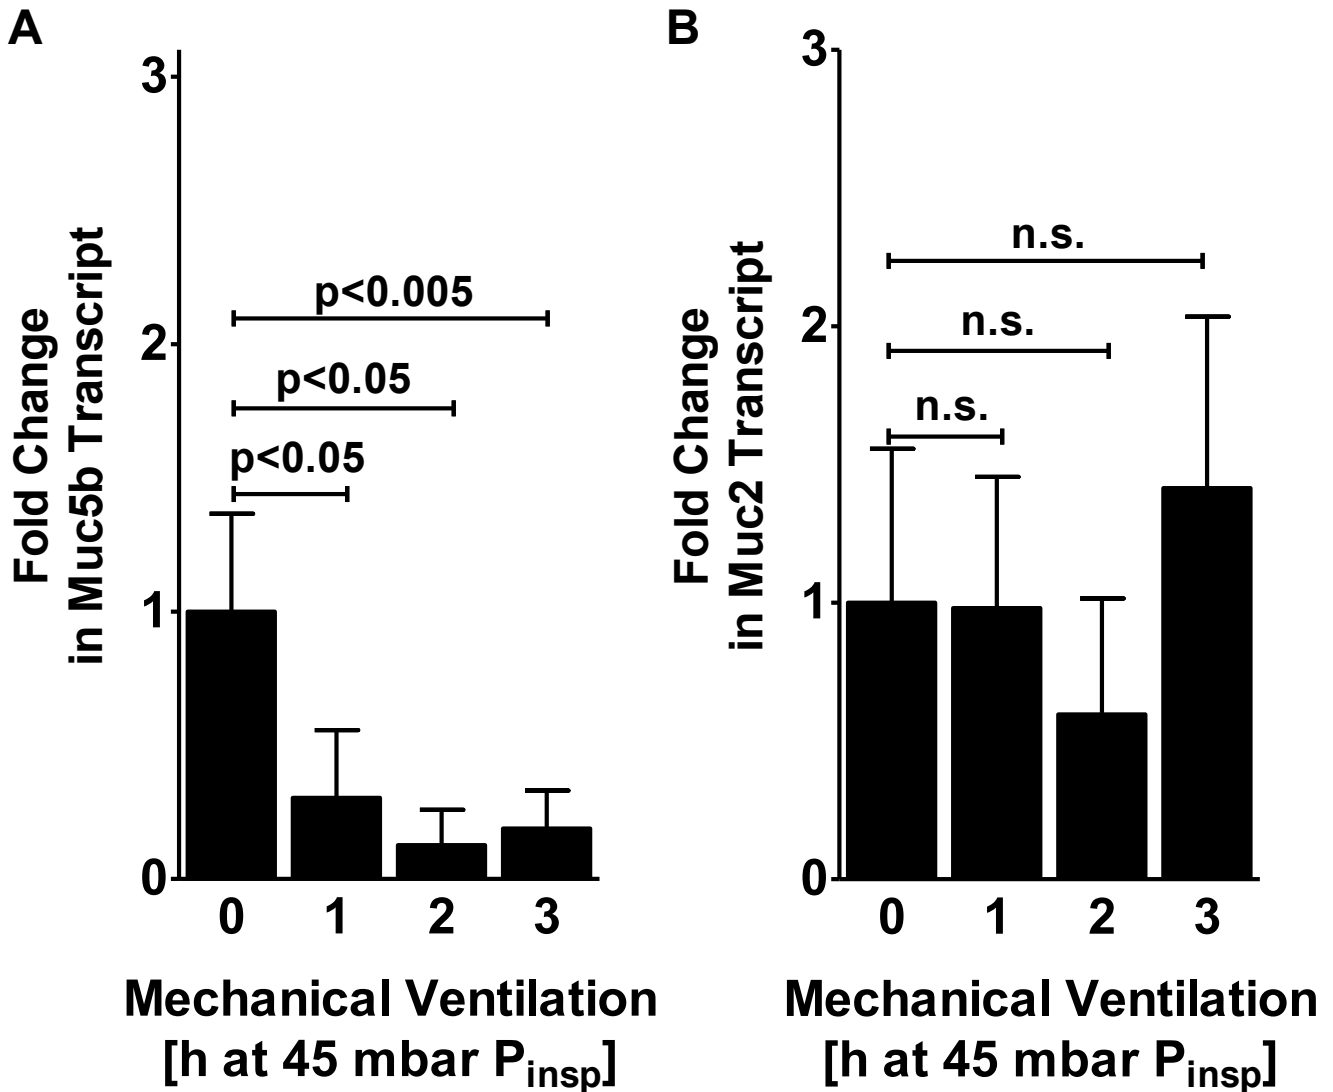

**Supplemental Figure 1.** *Muc5b* and *Muc2* transcript levels during acute lung injury *in vivo*. C57BL/6 mice were mechanically ventilated (inspiratory pressure 45 mbar, 100% oxygen). After indicated time periods, lungs were harvested; total RNA isolated and (A) *Muc5b* and (B) *Muc2* mRNA levels were determined by real-time RT-PCR. Data are calculated relative to the internal housekeeping gene ( $\beta$ -actin) and are expressed as mean fold change compared with control (0 h ventilation)  $\pm$  SD. (n=4).

## Summary of patient sample

| Group   | Age (years) | Sex    | Scores (on day 0) |      | P <sub>a</sub> O <sub>2</sub> /F <sub>i</sub> O <sub>2</sub> | ALI etiology |
|---------|-------------|--------|-------------------|------|--------------------------------------------------------------|--------------|
|         |             |        | APACHE II         | SOFA |                                                              |              |
| ALI     | 61.2        | male   | 26                | 8    | < 300                                                        | Sepsis       |
|         | 48.1        | male   | 28                | 7    | < 300                                                        | Pneumonia    |
|         | 43          | female | 5                 | 3    | < 300                                                        | Pneumonia    |
|         | 42.1        | male   | 15                | 9    | < 300                                                        | Aspiration   |
|         | 62.2        | male   | 25                | 4    | < 300                                                        | Aspiration   |
| Control | 39.0        | female | 0                 | 0    | n/a                                                          | n/a          |
|         | 42.0        | male   | 0                 | 0    | n/a                                                          | n/a          |
|         | 45.0        | male   | 0                 | 0    | n/a                                                          | n/a          |
|         | 54.0        | male   | 0                 | 0    | n/a                                                          | n/a          |
|         | 44.0        | male   | 0                 | 0    | n/a                                                          | n/a          |

\* Acute Physiology and Chronic Health Evaluation II

# Sequential Organ Failure Assessment score

**Supplemental Table 1.** *Patient characteristics of BAL samples.* From patients with acute lung injury (ALI), bronchoalveolar fluid (BAL) was collected and the *Acute Physiology and Chronic Health Evaluation II* (APACHE II) and the *Sequential Organ Failure Assessment* (SOFA) were assessed. Demographic data and samples were made available through clinical trial NCT00201409. Samples from subjects from unconnected study without acute lung injury served as controls. Demographic data and samples of the study subjects were made available through clinical trial NCT00201409

## Supplemental Table 2

| <u>Alveolar congestions</u> |          | <u>Hemorrhage</u> |          | <u>Neutrophil aggregation</u> |          | <u>Hyaline membrane</u> |          |
|-----------------------------|----------|-------------------|----------|-------------------------------|----------|-------------------------|----------|
| 1                           | Mild     | 1                 | Mild     | 1                             | Mild     | 1                       | Mild     |
| 2                           | Moderate | 2                 | Moderate | 2                             | Moderate | 2                       | Moderate |
| 3                           | Severe   | 3                 | Severe   | 3                             | Severe   | 3                       | Severe   |
| 4                           | Maximal  | 4                 | Maximal  | 4                             | Maximal  | 4                       | Maximal  |

**Supplemental Table 2.** *Histological scoring system for Ventilator induced lung injury .* For each subject (alveolar congestion, hemorrhage, neutrophil aggregation and hyaline membranes), a five-point scale is applied: 0 = minimal (little) damage, 1+ = mild damage, 2+ = moderate damage, 3+ = severe damage, and 4+ = maximal damage.

# Supplemental Table 3

## Inflammatory Cytokines & Receptors PCR array analysis in *Muc5ac*<sup>+/+</sup> and *Muc5ac*<sup>-/-</sup>

| Reference sequence | Gene   | Description                                          | Fold difference              |                              |
|--------------------|--------|------------------------------------------------------|------------------------------|------------------------------|
|                    |        |                                                      | <i>Muc5ac</i> <sup>+/+</sup> | <i>Muc5ac</i> <sup>-/-</sup> |
|                    |        | ATP-binding cassette, sub-family F (GCN20), member 1 |                              |                              |
| NM_013854          | Abcf1  |                                                      | 1.1867                       | -1.083                       |
| NM_009744          | Bcl6   | B-cell leukemia/lymphoma 6                           | 1.0224                       | -1.1933                      |
| NM_007551          | Cxcr5  | Chemokine (C-X-C motif) receptor 5                   | -1.5999                      | -1.4142                      |
| NM_009778          | C3     | Complement component 3                               | -1.3784                      | 1.3149                       |
| NM_009807          | Casp1  | Caspase 1                                            | -1.1313                      | 1.1368                       |
| NM_011329          | Ccl1   | Chemokine (C-C motif) ligand 1                       | 1.9212                       | -1.459                       |
| NM_011330          | Ccl11  | Chemokine (C-C motif) ligand 11                      | 3.121                        | 2.4116                       |
| NM_011331          | Ccl12  | Chemokine (C-C motif) ligand 12                      | 3.0251                       | 4.0558                       |
| NM_011332          | Ccl17  | Chemokine (C-C motif) ligand 17                      | 3.9917                       | 2.4453                       |
| NM_011888          | Ccl19  | Chemokine (C-C motif) ligand 19                      | 1.8622                       | 2.362                        |
| NM_011333          | Ccl2   | Chemokine (C-C motif) ligand 2                       | 9.461                        | 10.7406                      |
| NM_016960          | Ccl20  | Chemokine (C-C motif) ligand 20                      | 6.1988                       | 1.2658                       |
| NM_009137          | Ccl22  | Chemokine (C-C motif) ligand 22                      | 1.7435                       | -1.1329                      |
| NM_019577          | Ccl24  | Chemokine (C-C motif) ligand 24                      | -1.4025                      | 1.3287                       |
| NM_009138          | Ccl25  | Chemokine (C-C motif) ligand 25                      | -1.0091                      | -1.3059                      |
| NM_011337          | Ccl3   | Chemokine (C-C motif) ligand 3                       | 6.1347                       | 5.6962                       |
| NM_013652          | Ccl4   | Chemokine (C-C motif) ligand 4                       | 6.0503                       | 5.5213                       |
| NM_013653          | Ccl5   | Chemokine (C-C motif) ligand 5                       | -1.3641                      | -1.7839                      |
| NM_009139          | Ccl6   | Chemokine (C-C motif) ligand 6                       | 1.0845                       | 1.7532                       |
| NM_013654          | Ccl7   | Chemokine (C-C motif) ligand 7                       | 14.0939                      | 9.9177                       |
| NM_021443          | Ccl8   | Chemokine (C-C motif) ligand 8                       | -1.9903                      | -1.1134                      |
| NM_011338          | Ccl9   | Chemokine (C-C motif) ligand 9                       | 1.7925                       | 3.4224                       |
| NM_009912          | Ccr1   | Chemokine (C-C motif) receptor 1                     | 4.9657                       | 8.8458                       |
| NM_009915          | Ccr2   | Chemokine (C-C motif) receptor 2                     | -1.5562                      | 4.3772                       |
| NM_009914          | Ccr3   | Chemokine (C-C motif) receptor 3                     | 1.3213                       | 3.4462                       |
| NM_009916          | Ccr4   | Chemokine (C-C motif) receptor 4                     | 1.0996                       | -3.042                       |
| NM_009917          | Ccr5   | Chemokine (C-C motif) receptor 5                     | -1.1471                      | 4.5002                       |
| NM_009835          | Ccr6   | Chemokine (C-C motif) receptor 6                     | -2.8442                      | 1.4845                       |
| NM_007719          | Ccr7   | Chemokine (C-C motif) receptor 7                     | -1.498                       | -2.2658                      |
| NM_007720          | Ccr8   | Chemokine (C-C motif) receptor 8                     | -1.0231                      | 1.1096                       |
| NM_009913          | Ccr9   | Chemokine (C-C motif) receptor 9                     | -2.0463                      | -2.6574                      |
| NM_007768          | Crp    | C-reactive protein, pentraxin-related                | 3.1976                       | 1.2527                       |
| NM_009142          | Cx3cl1 | Chemokine (C-X3-C motif) ligand 1                    | -1.1274                      | -1.7532                      |
| NM_008176          | Cxcl1  | Chemokine (C-X-C motif) ligand 1                     | 15.4764                      | 10.8528                      |
| NM_021274          | Cxcl10 | Chemokine (C-X-C motif) ligand 10                    | 3.5975                       | 3.3636                       |
| NM_019494          | Cxcl11 | Chemokine (C-X-C motif) ligand 11                    | -2.5901                      | 1.3996                       |
| NM_021704          | Cxcl12 | Chemokine (C-X-C motif) ligand 12                    | -2.3587                      | -2.3376                      |
| NM_018866          | Cxcl13 | Chemokine (C-X-C motif) ligand 13                    | -1.2728                      | 3.2266                       |
| NM_011339          | Cxcl15 | Chemokine (C-X-C motif) ligand 15                    | -2.4504                      | -1.5583                      |
| NM_019932          | Pf4    | Platelet factor 4                                    | -1.0703                      | 1.1567                       |
| NM_009141          | Cxcl5  | Chemokine (C-X-C motif) ligand 5                     | 4.8804                       | 16.7955                      |
| NM_008599          | Cxcl9  | Chemokine (C-X-C motif) ligand 9                     | -2.8442                      | 3.4224                       |
| NM_009910          | Cxcr3  | Chemokine (C-X-C motif) receptor 3                   | -1.8                         | -1.4489                      |
| NM_007721          | Ccr10  | Chemokine (C-C motif) receptor 10                    | -2.7568                      | -1.3287                      |
| NM_008337          | Iifng  | Interferon gamma                                     | 1.0585                       | -1.4241                      |
| NM_010548          | Il10   | Interleukin 10                                       | 5.6256                       | 1.9185                       |
| NM_008348          | Il10ra | Interleukin 10 receptor, alpha                       | -1.1712                      | 1.21                         |
| NM_008349          | Il10rb | Interleukin 10 receptor, beta                        | -1.3315                      | -1.7351                      |

## Supplemental Table 3

|           |          |                                                                         |         |         |
|-----------|----------|-------------------------------------------------------------------------|---------|---------|
| NM_008350 | Il11     | Interleukin 11                                                          | 6.6208  | 1.5583  |
| NM_008355 | Il13     | Interleukin 13                                                          | 2.4829  | -1.459  |
| NM_133990 | Il13ra1  | Interleukin 13 receptor, alpha 1                                        | 1.431   | 1.4241  |
| NM_008357 | Il15     | Interleukin 15                                                          | -1.0446 | -1.9319 |
| NM_010551 | Il16     | Interleukin 16                                                          | -1.3928 | -1.4241 |
| NM_019508 | Il17b    | Interleukin 17B                                                         | -1.35   | -4.1989 |
| NM_008360 | Il18     | Interleukin 18                                                          | -1.4876 | -1.3472 |
| NM_010554 | Il1a     | Interleukin 1 alpha                                                     | 2.1992  | 1.4489  |
| NM_008361 | Il1b     | Interleukin 1 beta                                                      | 6.7599  | 3.5064  |
| NM_019450 | Il1f6    | Interleukin 1 family, member 6                                          | -1.1119 | 20.6061 |
| NM_027163 | Il1f8    | Interleukin 1 family, member 8                                          | -1.0161 | 5.9381  |
| NM_008362 | Il1r1    | Interleukin 1 receptor, type I                                          | 1.4064  | 1.4845  |
| NM_010555 | Il1r2    | Interleukin 1 receptor, type II                                         | 18.4047 | 18.6357 |
| NM_021380 | Il20     | Interleukin 20                                                          | 3.0994  | -1.459  |
| NM_008368 | Il2rb    | Interleukin 2 receptor, beta chain                                      | -1.7752 | -1.4743 |
| NM_013563 | Il2rg    | Interleukin 2 receptor, gamma chain                                     | 1.1543  | 1.1329  |
| NM_010556 | Il3      | Interleukin 3                                                           | 1.5021  | -1.9119 |
| NM_021283 | Il4      | Interleukin 4                                                           | 1.0439  | 1.3996  |
| NM_008370 | Il5ra    | Interleukin 5 receptor, alpha                                           | -2.7473 | -1.5422 |
| NM_010559 | Il6ra    | Interleukin 6 receptor, alpha                                           | 1.0882  | -1.279  |
| NM_010560 | Il6st    | Interleukin 6 signal transducer                                         | 1.1583  | -1.0943 |
| NM_009909 | Cxcr2    | Chemokine (C-X-C motif) receptor 2                                      | 6.4621  | 4.362   |
| NM_008401 | Itgam    | Integrin alpha M                                                        | 2.415   | 4.0139  |
| NM_008404 | Itgb2    | Integrin beta 2                                                         | 1.2897  | 1.2746  |
| NM_010735 | Lta      | Lymphotoxin A                                                           | -2.148  | -1.1607 |
| NM_008518 | Ltb      | Lymphotoxin B                                                           | -1.7876 | -2.5403 |
| NM_010798 | Mif      | Macrophage migration inhibitory factor                                  | -1.2861 | -1.1487 |
| NM_007926 | Aimp1    | Aminoacyl tRNA synthetase complex-interacting multifunctional protein 1 | -1.6279 | -1.3519 |
| NM_009263 | Spp1     | Secreted phosphoprotein 1                                               | 1.6552  | -2.9794 |
| NM_011577 | Tgfb1    | Transforming growth factor, beta 1                                      | 1.5659  | 1.1096  |
| NM_013693 | Tnf      | Tumor necrosis factor                                                   | 2.7076  | 2.6027  |
| NM_011609 | Tnfrsf1a | Tumor necrosis factor receptor superfamily, member 1a                   | 1.431   | 1.0718  |
| NM_011610 | Tnfrsf1b | Tumor necrosis factor receptor superfamily, member 1b                   | 1.6609  | 1.7839  |
| NM_011616 | Cd40lg   | CD40 ligand                                                             | -1.1352 | -2.4967 |
| NM_023764 | Tollip   | Toll interacting protein                                                | 1.0512  | -1.2702 |
| NM_011798 | Xcr1     | Chemokine (C motif) receptor 1                                          | -2.7953 | -2.2579 |
| NM_010368 | Gusb     | Glucuronidase, beta                                                     | -1.763  | -1.3947 |
| NM_013556 | Hprt     | Hypoxanthine guanine phosphoribosyl transferase                         | 1.0658  | -1.2184 |
| NM_008302 | Hsp90ab1 | Heat shock protein 90 alpha (cytosolic), class B member 1               | 1.1909  | -1.0943 |
| NM_008084 | Gapdh    | Glyceraldehyde-3-phosphate dehydrogenase                                | -1.0852 | 1.1647  |
| NM_007393 | Actb     | Actin, beta                                                             | 1.0073  | 1.0966  |

**Supplemental Table 3.** *PCR Array for cytokine and cytokine receptor regulation.* *Muc5ac*<sup>-/-</sup> mice or corresponding littermate controls matched in age, sex and weight (*Muc5a*<sup>+/+</sup>) were mechanically ventilated (inspiratory pressure 45 mbar, 100% oxygen). Total RNA was isolated and transcriptional changes were calculated relative to mRNA levels in control animals of the same genotype using an online analysis tool provided by the manufacturer of the PCR-Array platform (<http://pcrdataanalysis.sabiosciences.com>).

| Gene  | Description                           | Fold difference              |                              |
|-------|---------------------------------------|------------------------------|------------------------------|
|       |                                       | <i>Muc5ac</i> <sup>+/+</sup> | <i>Muc5ac</i> <sup>-/-</sup> |
| Ccl20 | Chemokine (C-C motif) ligand 20       | 6.1988                       | 1.2658                       |
| Ccl7  | Chemokine (C-C motif) ligand 7        | 14.0939                      | 9.9177                       |
| Cxcl1 | Chemokine (C-X-C motif) ligand 1      | 15.4764                      | 10.8528                      |
| Il11  | Interleukin 11                        | 6.6208                       | 1.5583                       |
| Crp   | C-reactive protein, pentraxin-related | 3.1976                       | 1.2527                       |
| Il1b  | Interleukin 1 beta                    | 6.7599                       | 3.5064                       |

**Supplemental Table 4.** Selection of mediators differential regulated between *Muc5ac*<sup>+/+</sup> and *Muc5ac*<sup>-/-</sup> from Supplemental table 1. *Muc5ac*<sup>-/-</sup> mice or corresponding littermate controls matched in age, sex and weight (*Muc5a*<sup>+/+</sup>) were mechanically ventilated (inspiratory pressure 45 mbar, 100% oxygen). Total RNA was isolated and transcriptional changes were calculated relative to mRNA levels in control animals of the same genotype using an online analysis tool provided by the manufacturer of the PCR-Array platform (<http://pcrdataanalysis.sabiosciences.com>).
